# Supplementary material for: An investigation of water status in gelatin methacrylate hydrogels by means of water relaxometry and differential scanning calorimetry
Source: Royal Society of Chemistry journal article supplement (doi:10.1039/d4tb00053f), 2024-01-01
Supplement: d4tb00053f1.pdf [file d4tb00053f1.pdf]

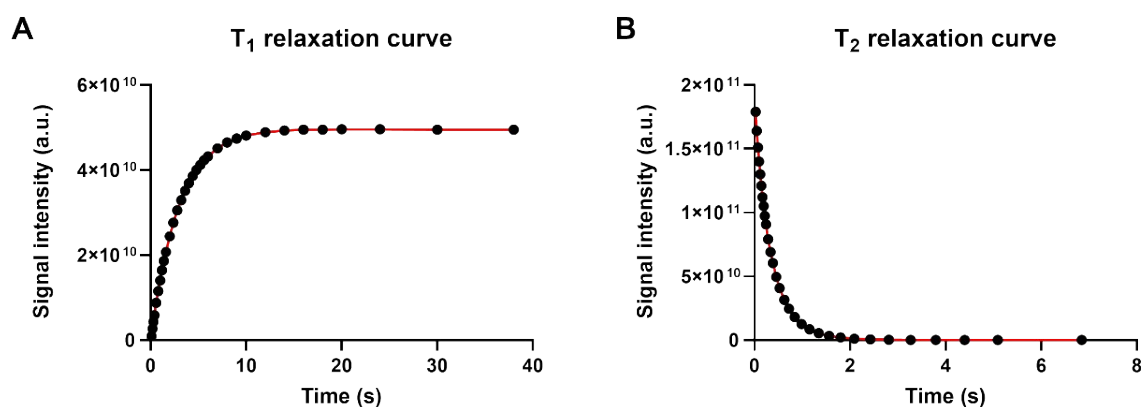

### Supplementary materials

Figure S1.  $T_1$  and  $T_2$  relaxation curve (A) and (B) (3.5% GelMA prepared in PBS as the example)

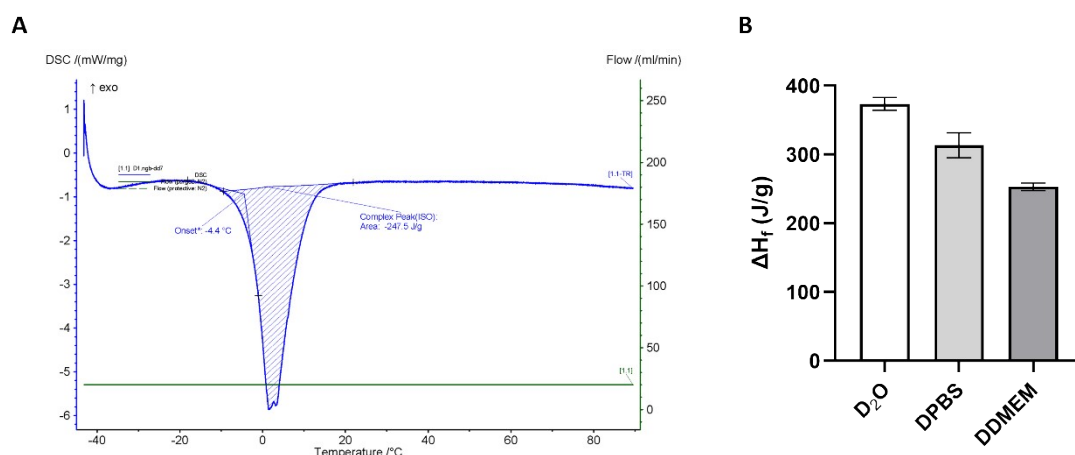

Fig. S2. Representative DSC trace and area by integration used in this research (DDMEM as the example) (A). Melting enthalpy ( $\Delta H_f$ ) of D<sub>2</sub>O, DPBS, and DDMEM (B). Error bars represent standard deviation of the mean.

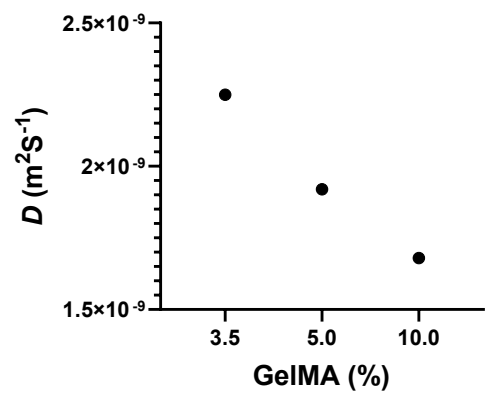

Fig. S3. Water diffusivity measurement by using pulsed-field gradient nuclear magnetic resonance in 3.5, 5, and 10% GelMA prepared in PBS.
